# Supplementary material
Source: PubMed Central journal article supplement (PMC3787123)
Supplement: NIHMS514845-supplement-1_si_001.pdf [file NIHMS514845-supplement-1_si_001.pdf]

**Supporting Information**

**for**

**“Identification of a novel  $\alpha$ -N-methylation modification of CENP-B that  
regulates its binding to the centromeric DNA” by Dai, X. et al.**

***J. Proteome Res.*, 2013**

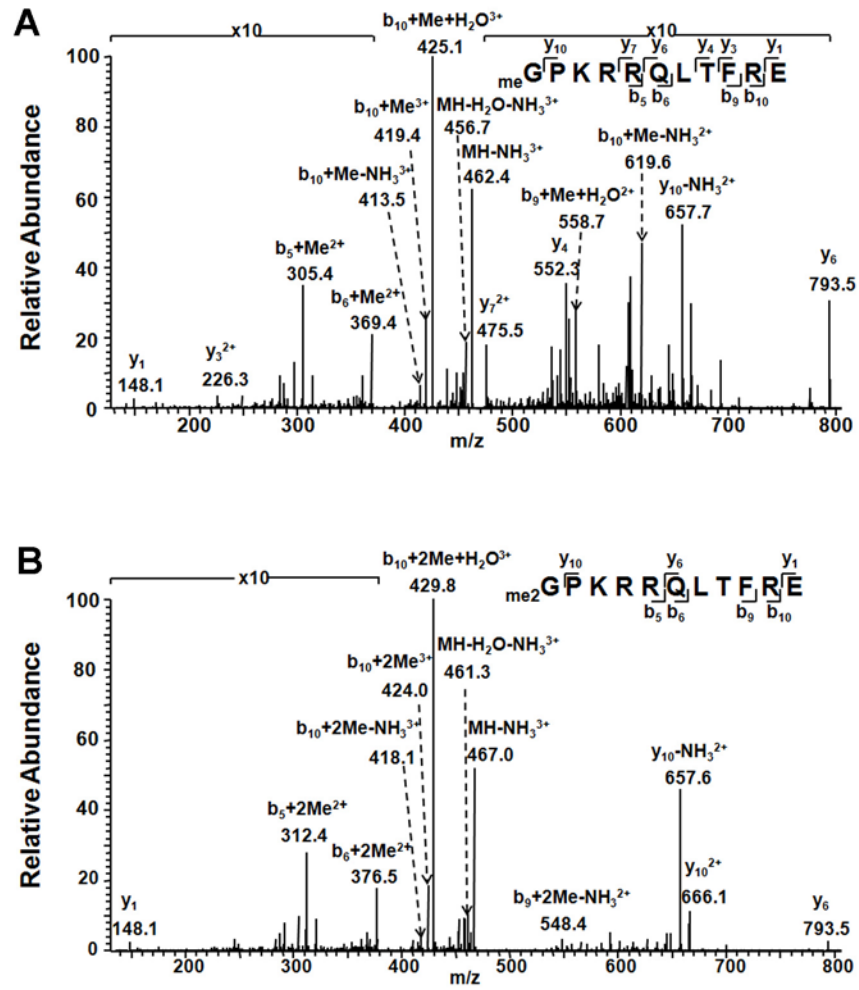

**Figure S1.** MS/MS of mono-methylated (A) and di-methylated (B) N-terminal peptide of CENP-B arising from the Glu-C digestion.

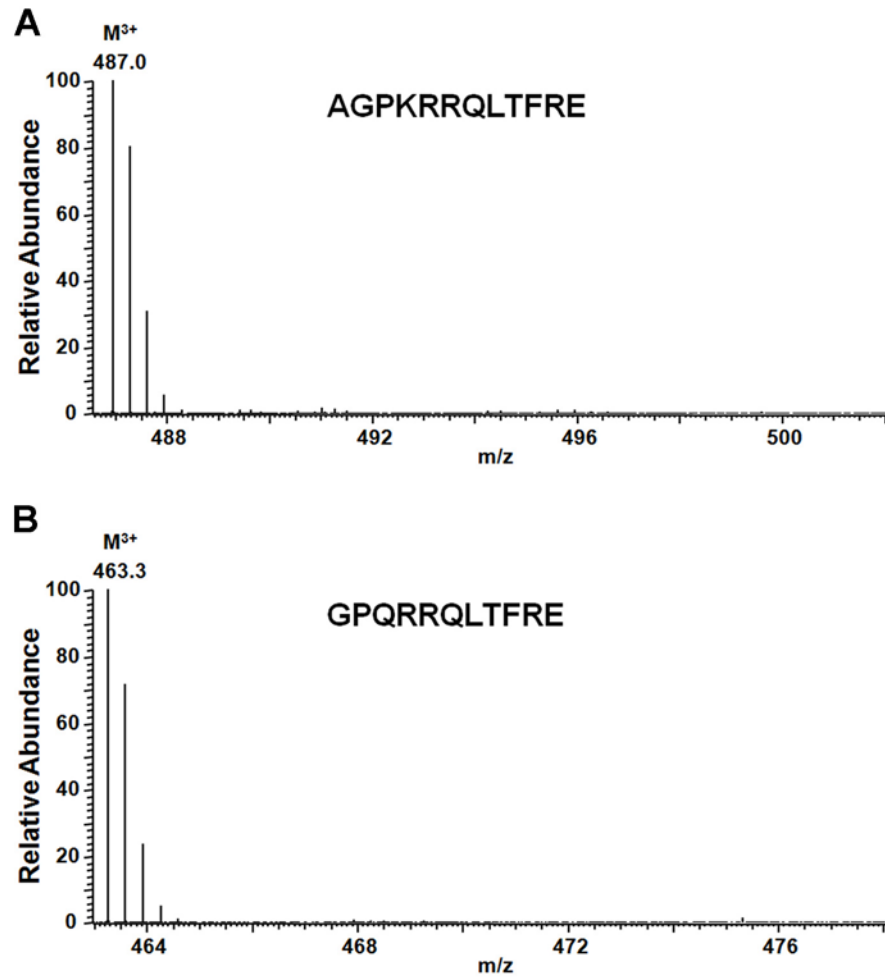

**Figure S2.** CENP-B-AGPK and -K4Q mutants abrogate  $\alpha$ -N-methylation in human cells. ESI-MS of N-terminal peptides of CENP-B-AGPK (A) and CENP-B-K4Q (B) from the Glu-C digestion of C-terminally FLAG-tagged proteins.
